# Supplementary material for: Power-law analysis of surface-plasmon-enhanced electromagnetic field dependence of blinking SERS of thiacyanine or thiacarbocyanine adsorbed on single silver nanoaggregates
Source: Royal Society of Chemistry journal article supplement (doi:10.1039/c0cp02802a), 2011-01-01

## Supplementary Information

**Yasutaka Kitahama,\*<sup>a</sup> Yuhei Tanaka,<sup>a</sup>  
Tamitake Itoh<sup>b</sup> and Yukihiro Ozaki<sup>a</sup>**

<sup>a</sup> Department of Chemistry, School of Science and Technology, Kwansei Gakuin University, Sanda, Hyogo 669-1337, Japan.

E-mail: kitahama@kwansei.ac.jp; Fax: +81 79 565 9077; Tel: +81 79 565 8349

<sup>b</sup> Nano-Bioanalysis Group, Health Technology Research Institute, National Institute of Advanced Industrial Science and Technology (AIST), Takamatsu, Kagawa 761-0395, Japan.

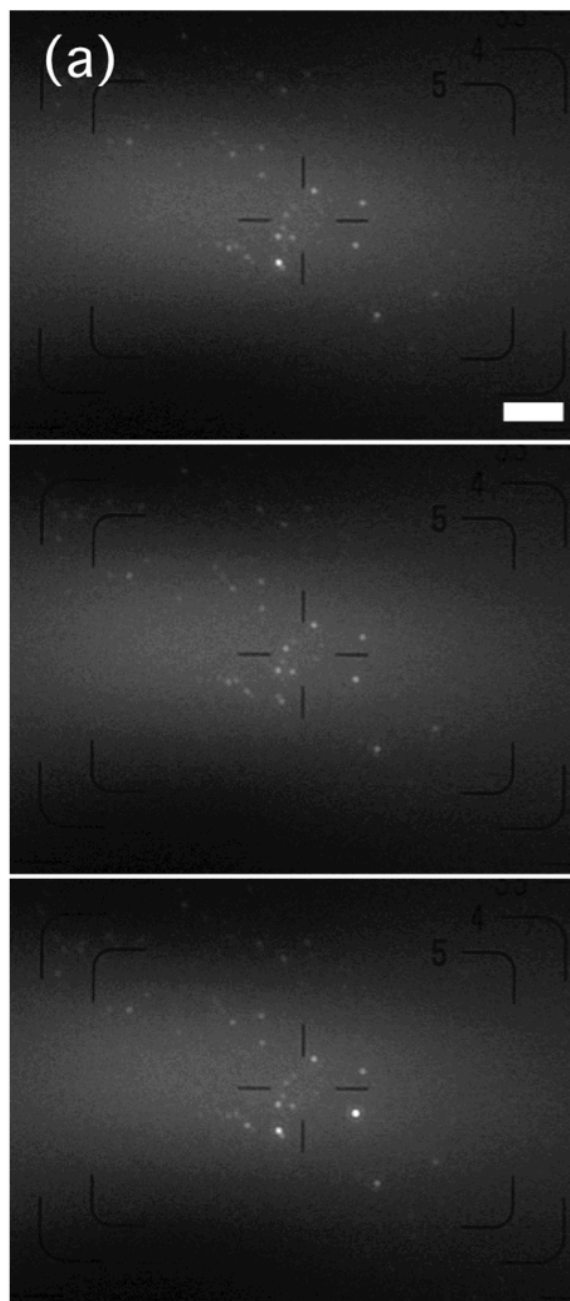

**Fig. S1** (a) Video microscope images of a single Ag nanoaggregate with adsorbed 3,3'-diethyl thiocyanine (TC) excited at 458 nm. Scale bar is 10  $\mu\text{m}$ . (b) The corresponding LSPR Rayleigh scattering microscope image in the same area.

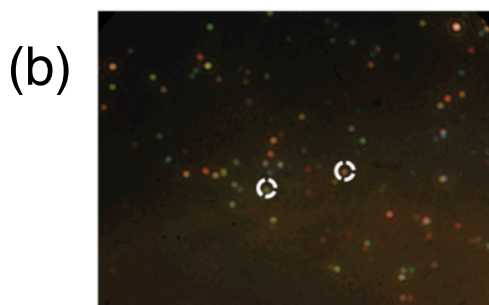

Supplement: c0cp02802a.pdf [file c0cp02802a.pdf]
